# Supplementary figures and images for: An efficient and transition metal free protocol for the transfer hydrogenation of ketones as a continuous flow process
Source: Royal Society of Chemistry journal article supplement (doi:10.1039/b821752a), 2009-01-01

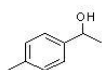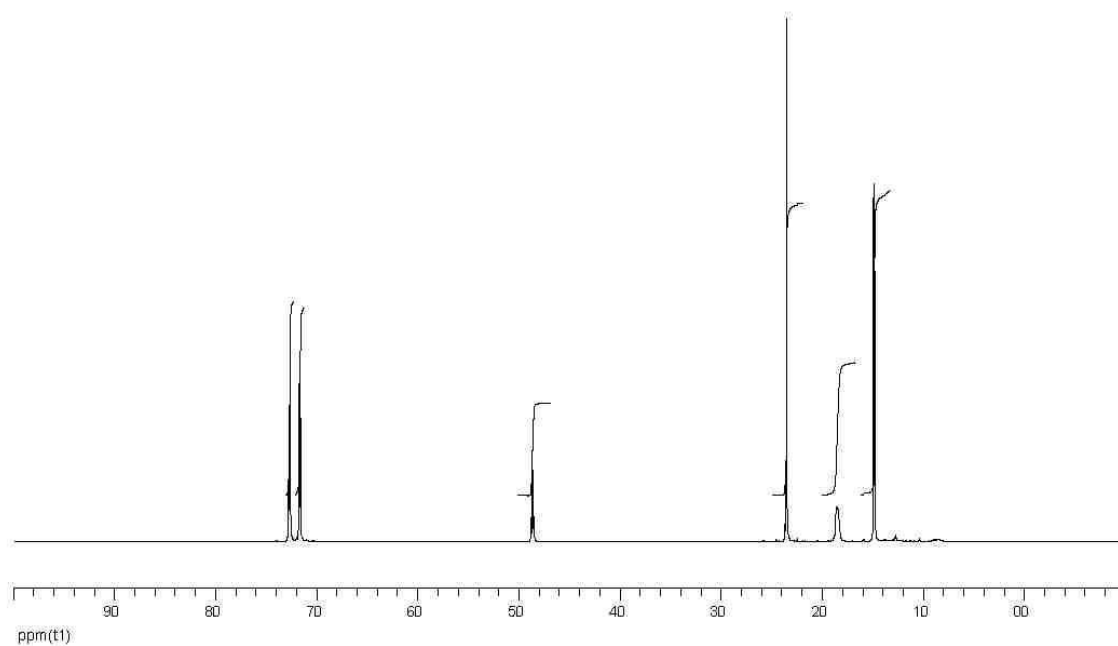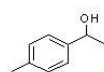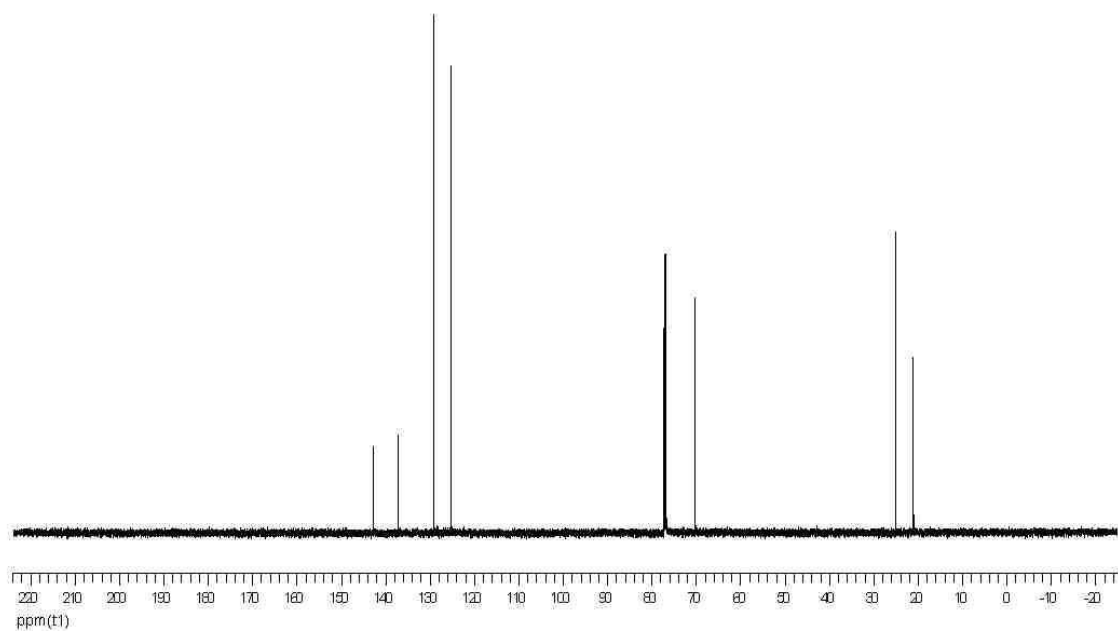

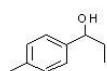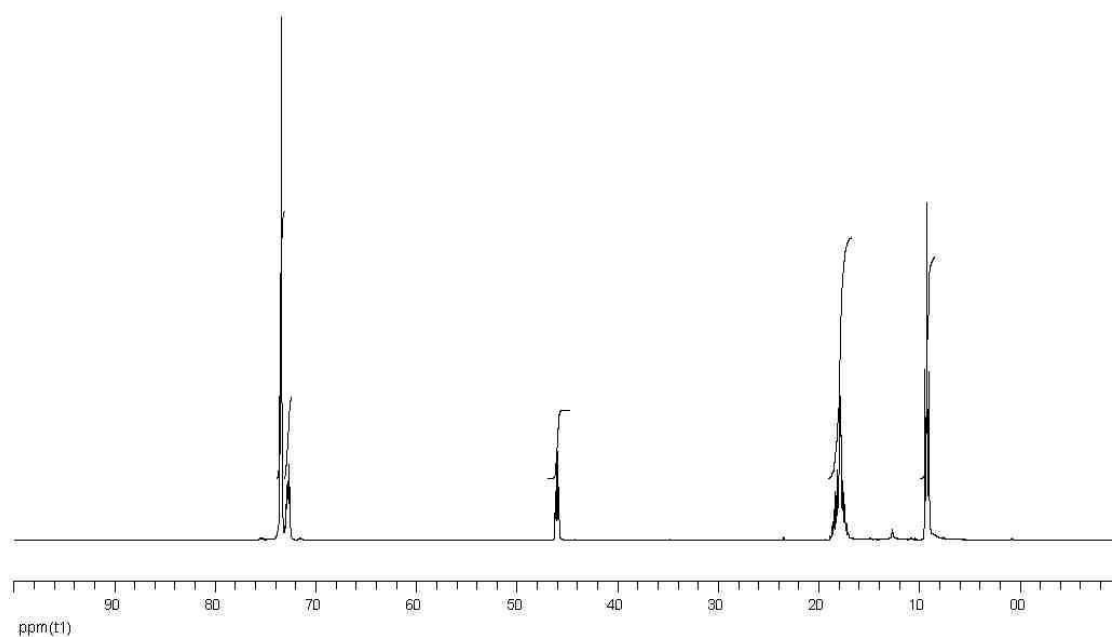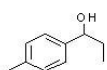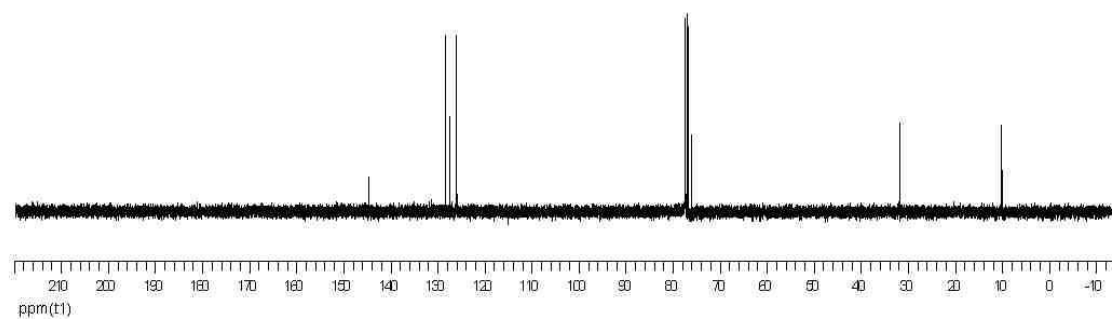

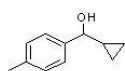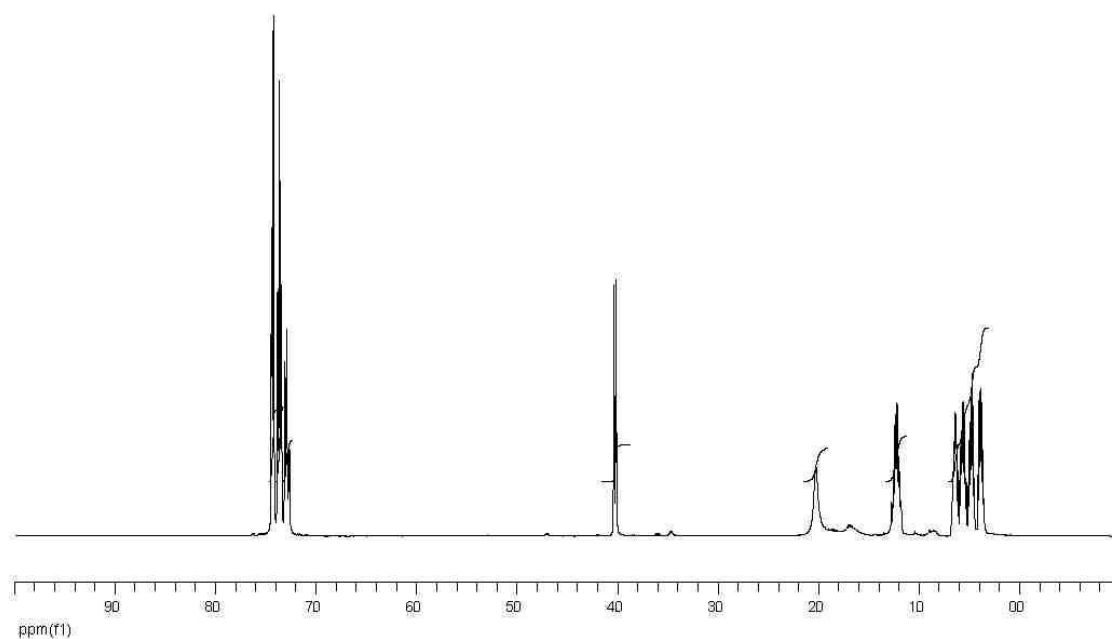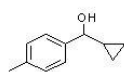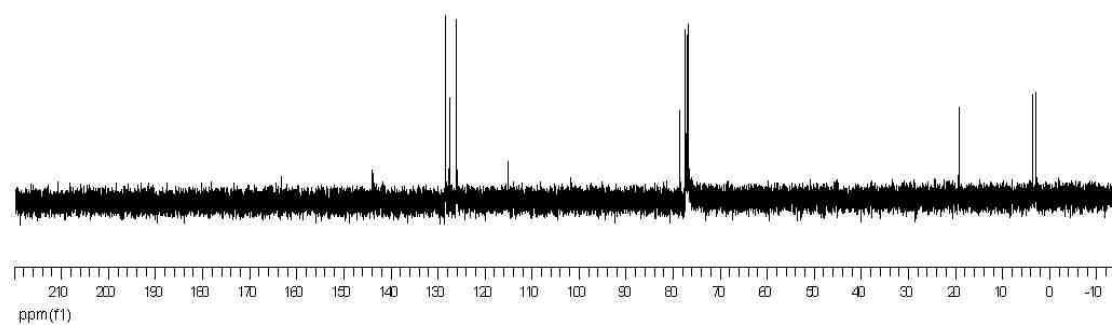

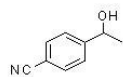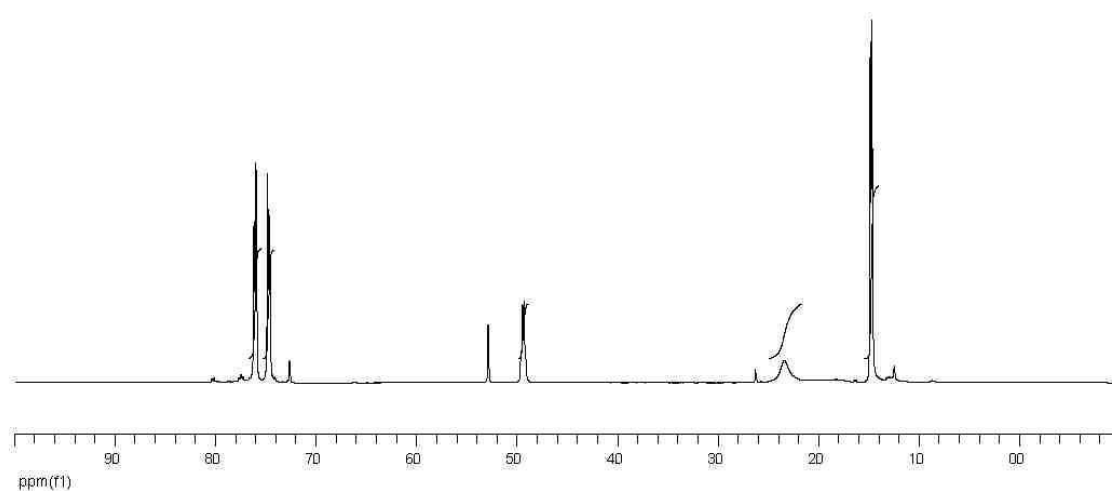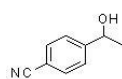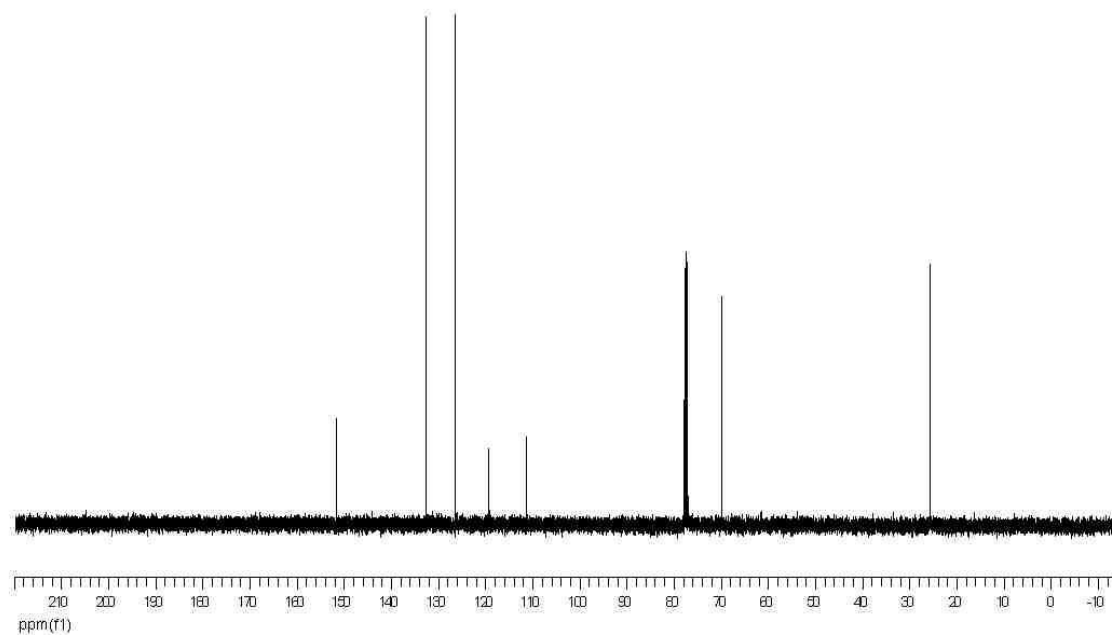

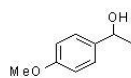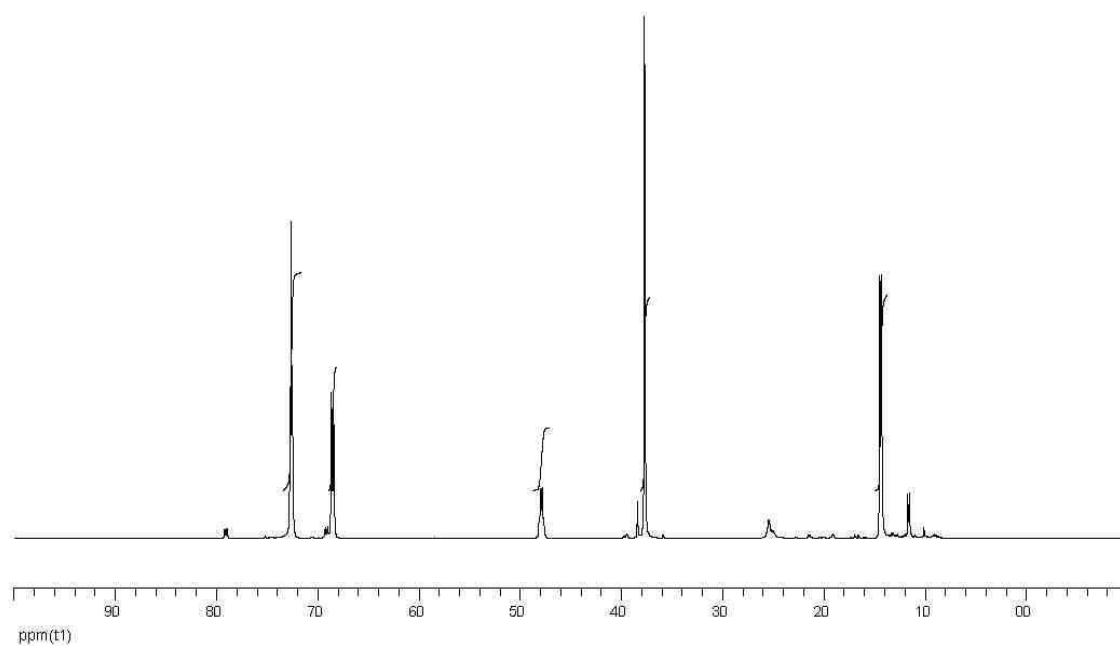

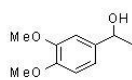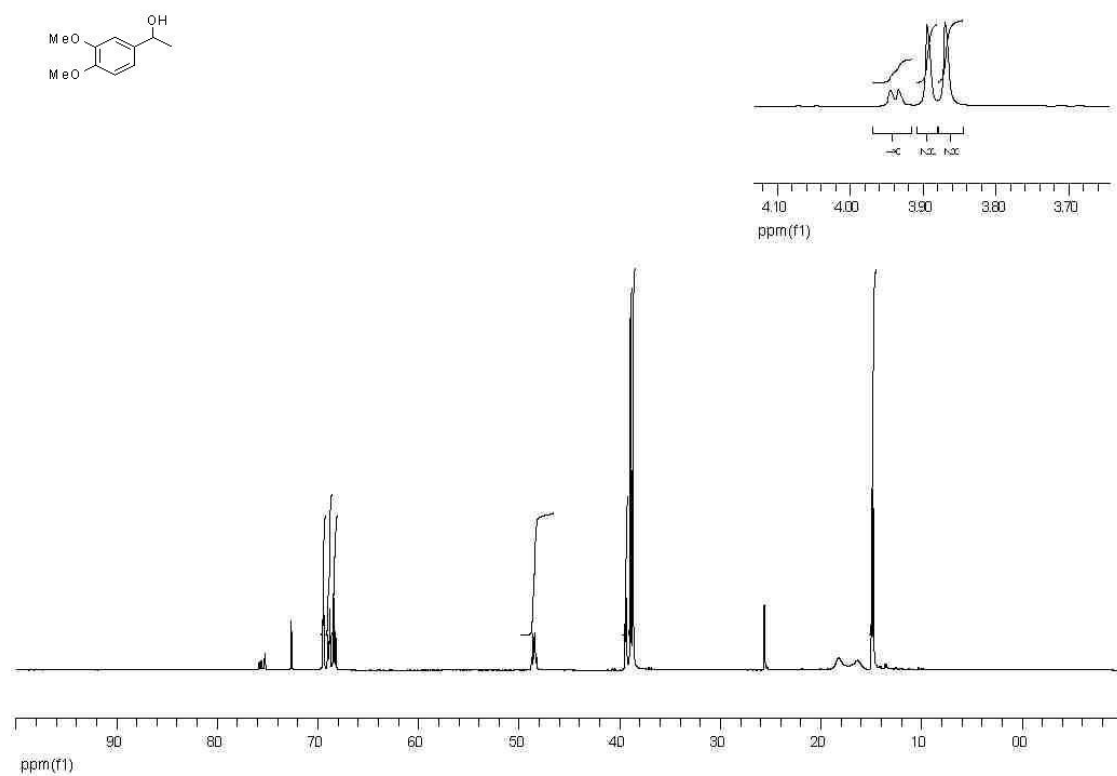

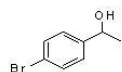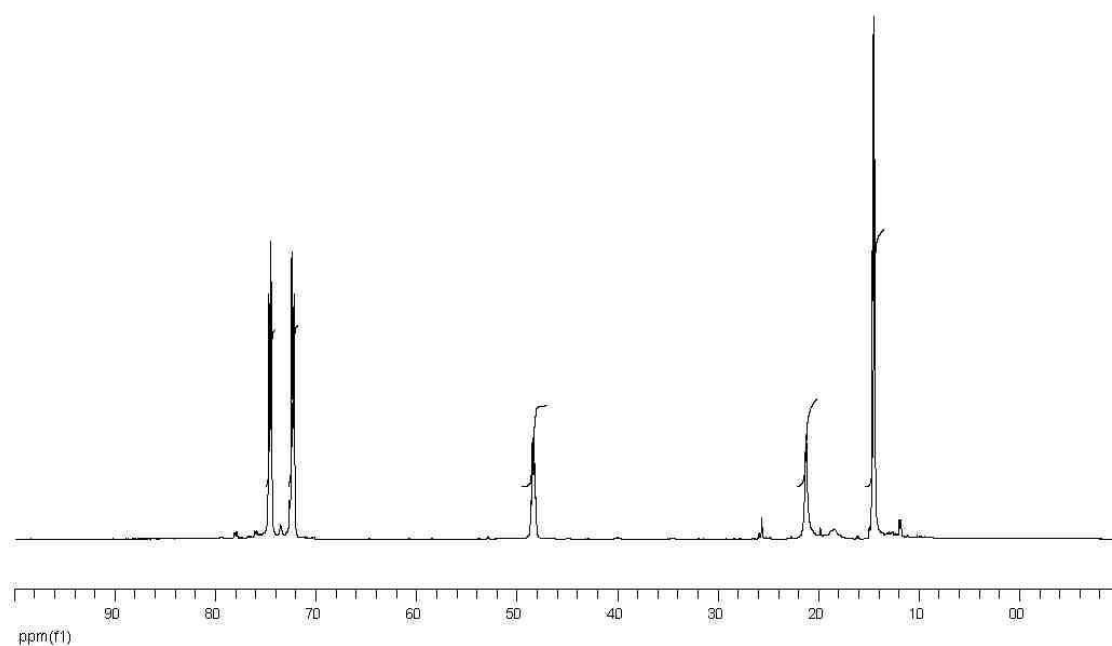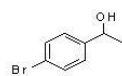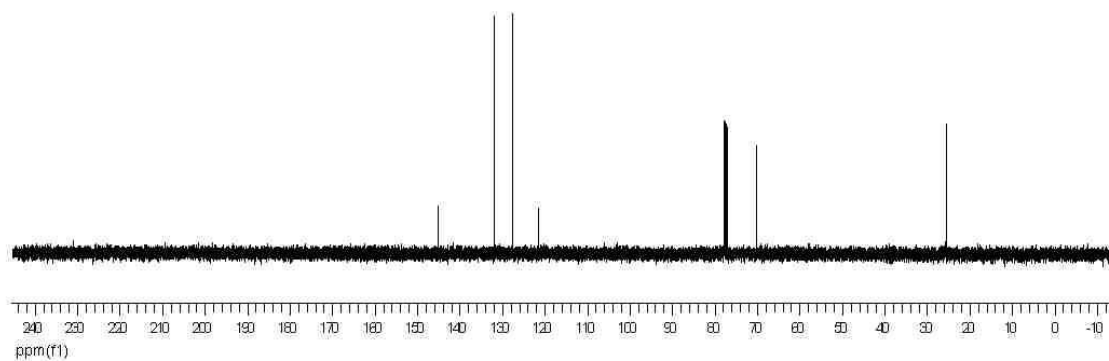

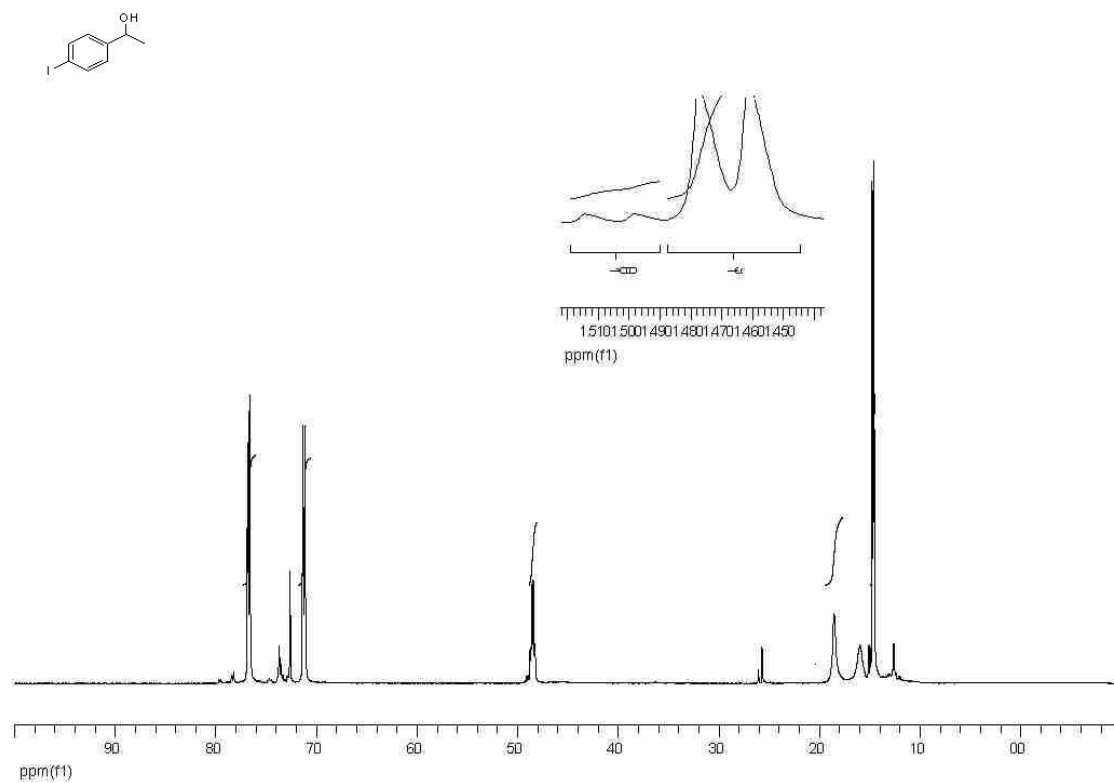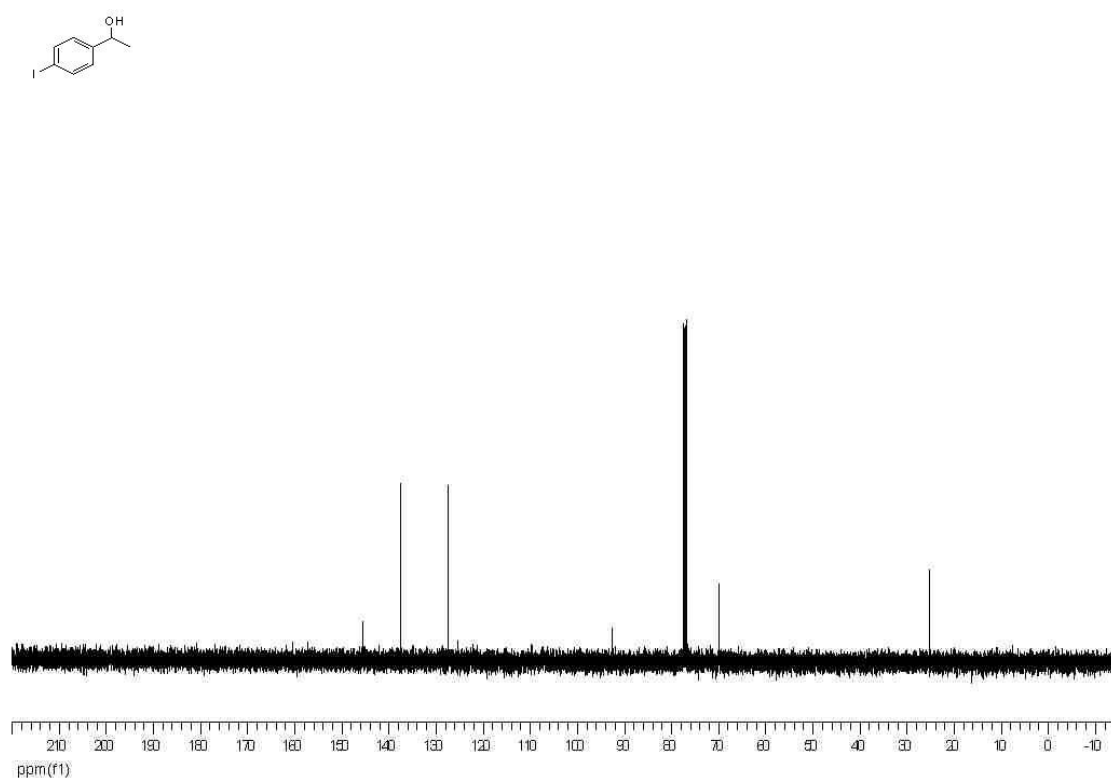



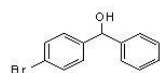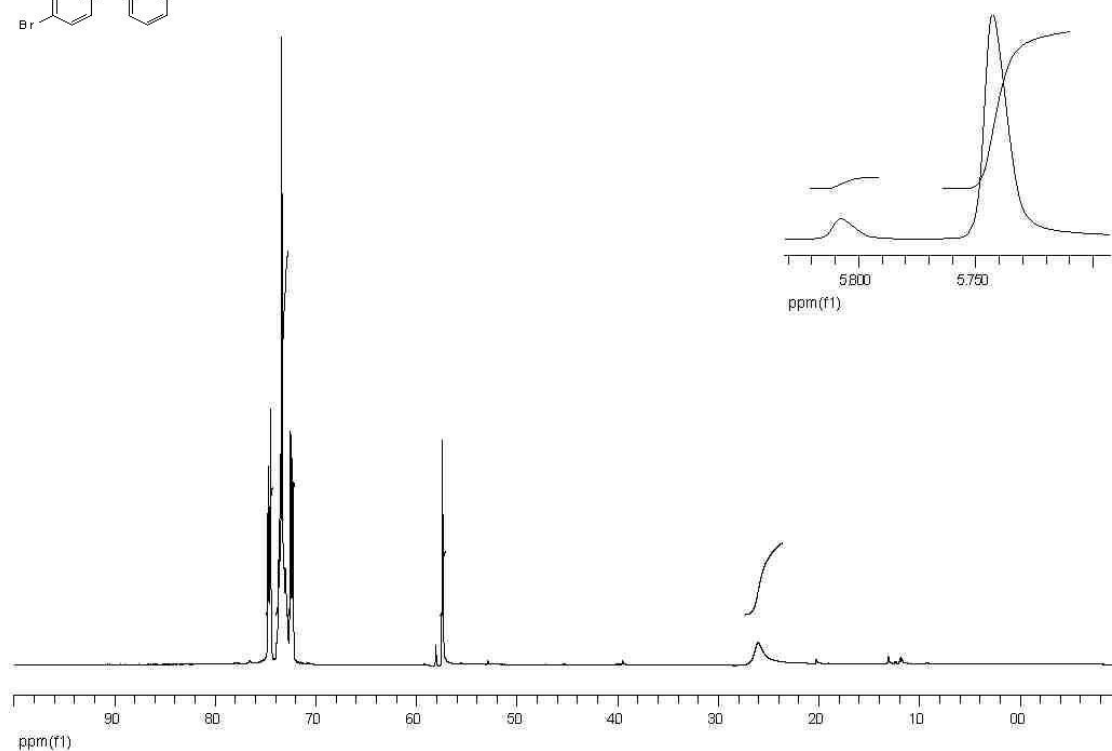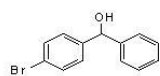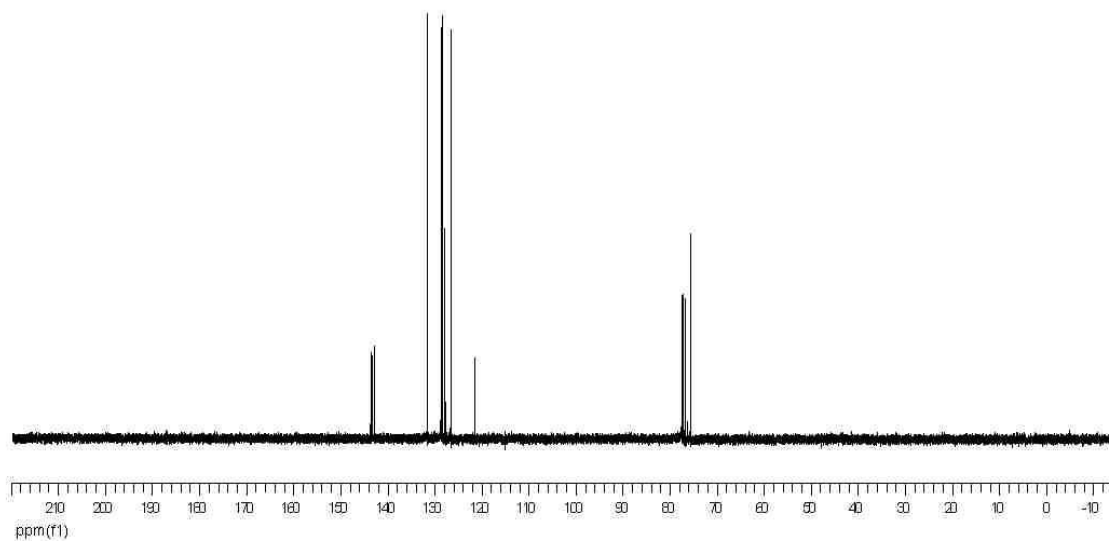

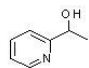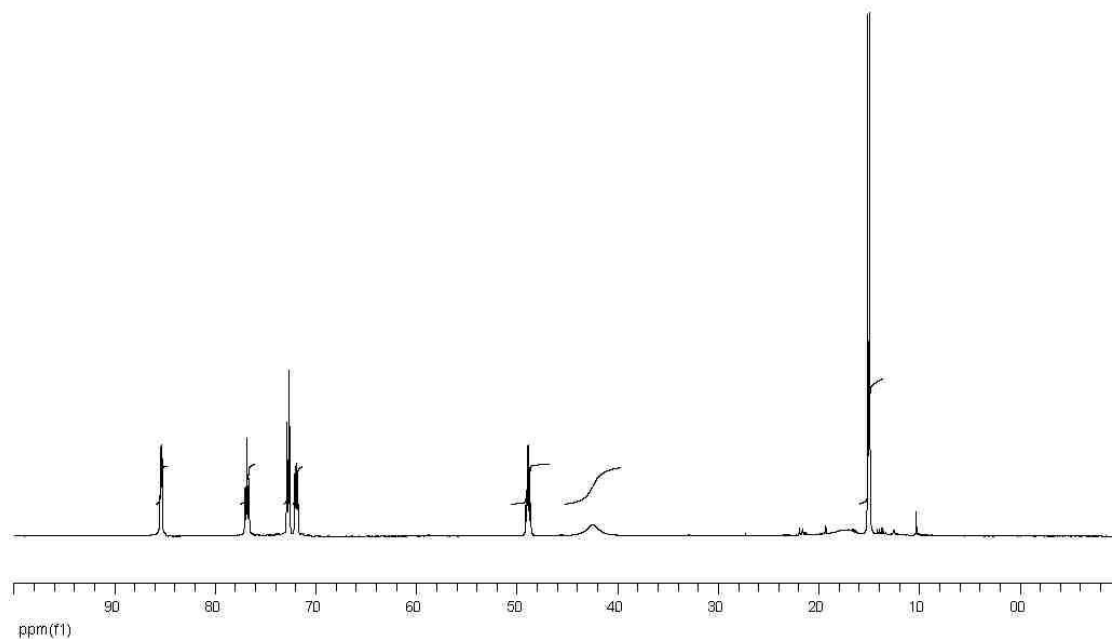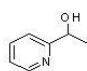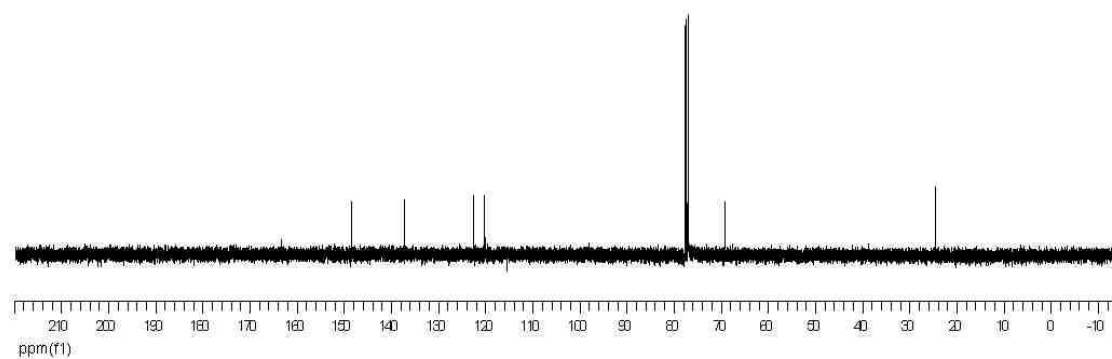

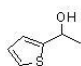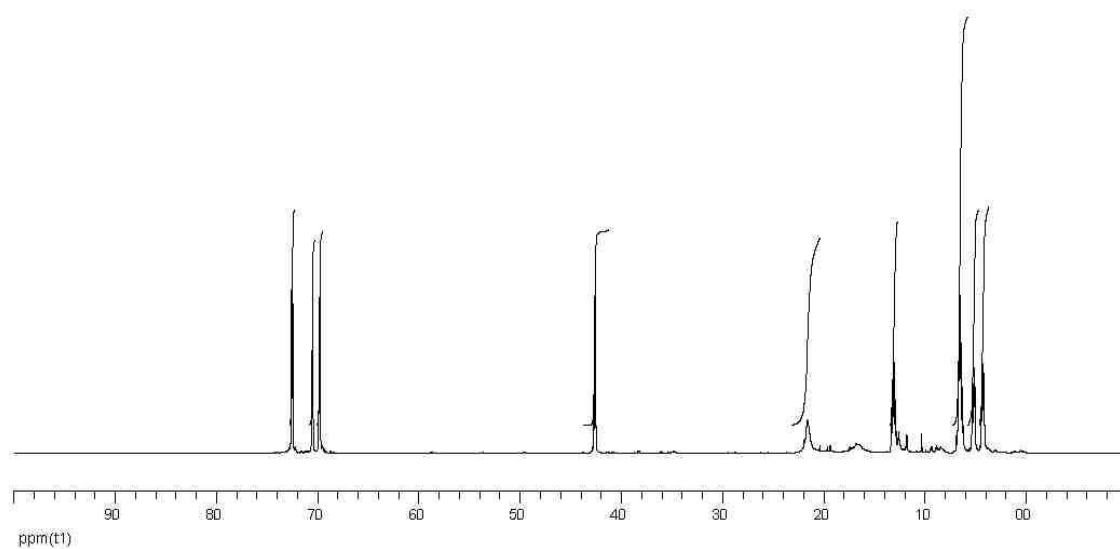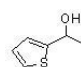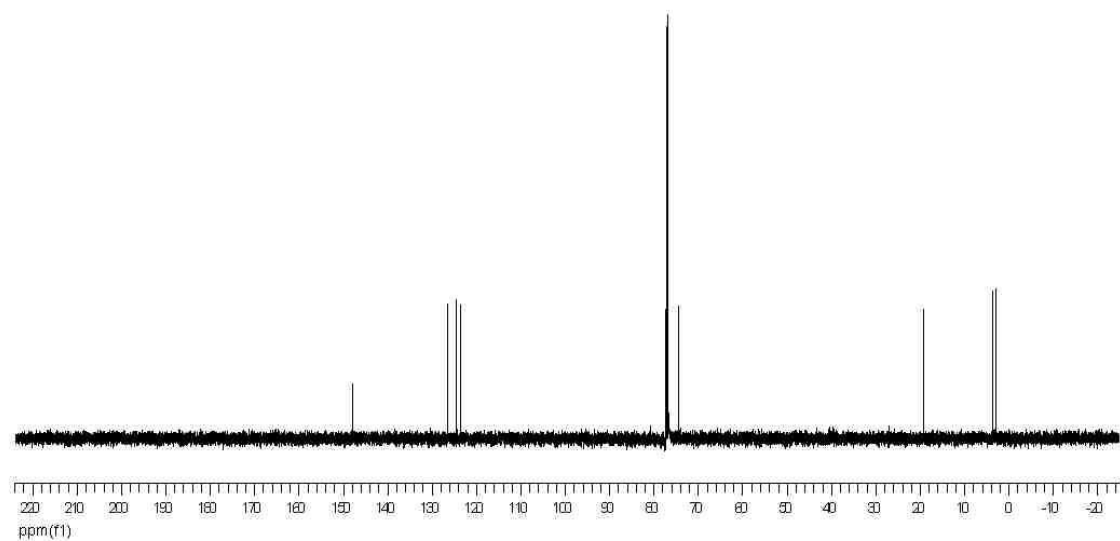

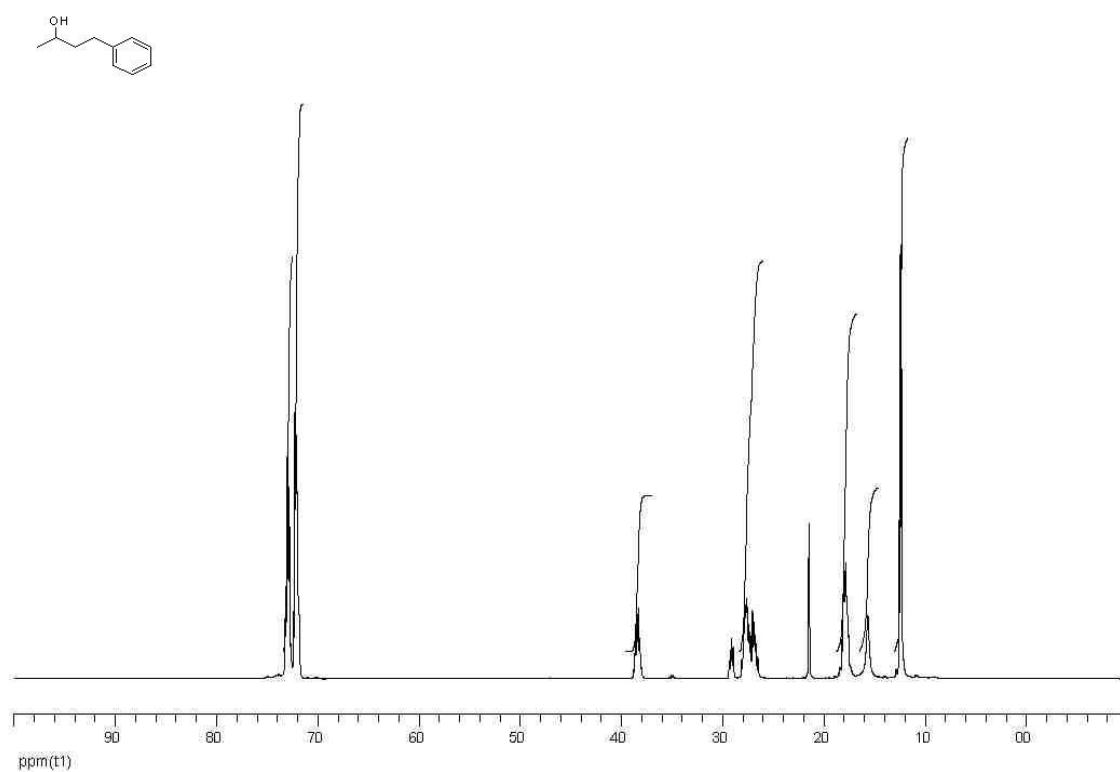

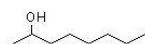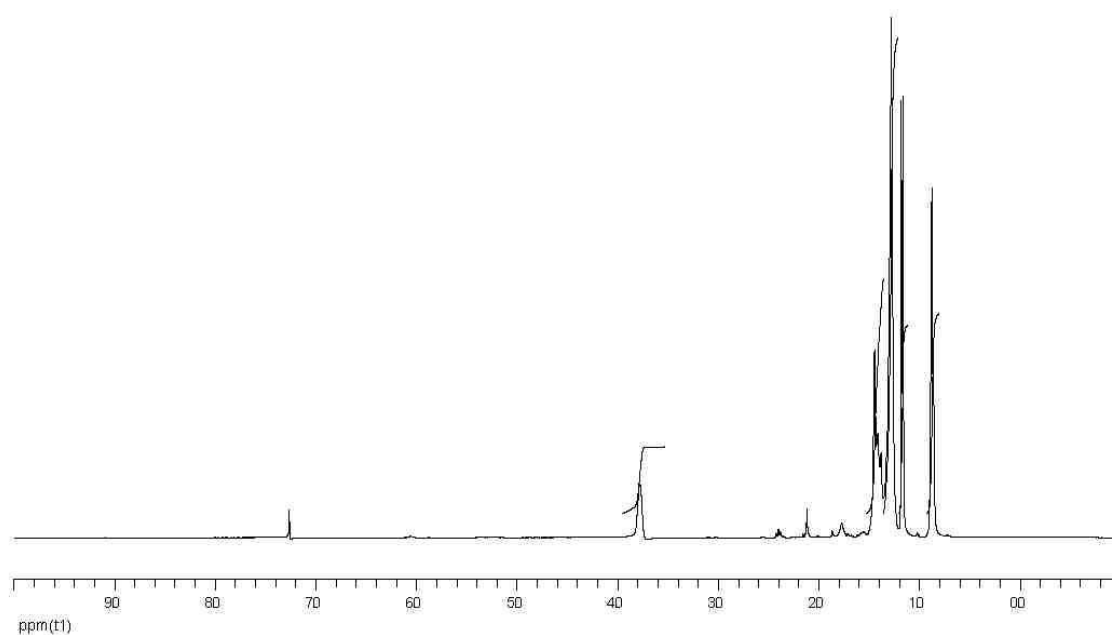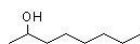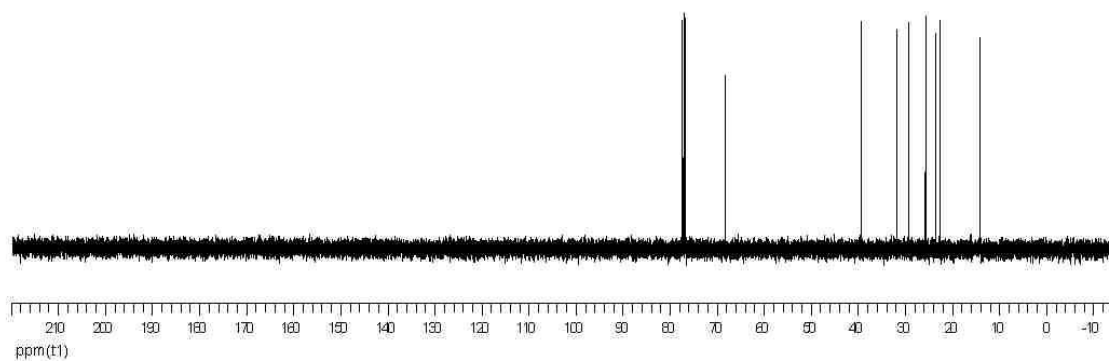

Supplement: b821752a.pdf [file b821752a.pdf]
